# Supplementary material for: Low-temperature combustion synthesis and UV treatment processed p-type Li:NiOx active semiconductors for high-performance electronics
Source: Royal Society of Chemistry journal article supplement (doi:10.1039/c8tc04594a), 2018-01-01
Supplement: c8tc04594a1.pdf [file c8tc04594a1.pdf]

## Supplementary Information

### Low-Temperature Combustion Synthesis & UV Treatment Processed p-Type Li:NiO<sub>x</sub> Active Semiconductors for High-Performance Electronics

Jun Yang<sup>a,c</sup>, Bowen Wang<sup>d</sup>, Yongpeng Zhang<sup>a,b</sup>, Xingwei Ding<sup>a,b,\*</sup>, Jianhua Zhang<sup>a,b,\*</sup>

<sup>a</sup>. Key Laboratory of Advanced Display and System Application, Ministry of Education, Shanghai University, Shanghai 200072, China

<sup>b</sup>. School of Mechatronics and Automation, Shanghai University, Shanghai 200072, China

<sup>c</sup>. School of Material Science and Engineering, Shanghai University, Shanghai 200072, China

<sup>d</sup>. Department of Materials Science and Engineering, Inter-university Semiconductor Research Center, College of Engineering, Seoul National University, Seoul, 08826, South Korea

---

\* Corresponding author: Key Laboratory of Advanced Display and System Application, Ministry of Education, Shanghai University, 149 Yanchang Road, Jingan District, Shanghai 200070, PR China  
E-mail: [xwding@shu.edu.cn](mailto:xwding@shu.edu.cn) (Xingwei Ding); [jhzhang@oa.shu.edu.cn](mailto:jhzhang@oa.shu.edu.cn) (Jianhua Zhang) Tel.: +86 21 56331976  
Fax: +86 21 39988216

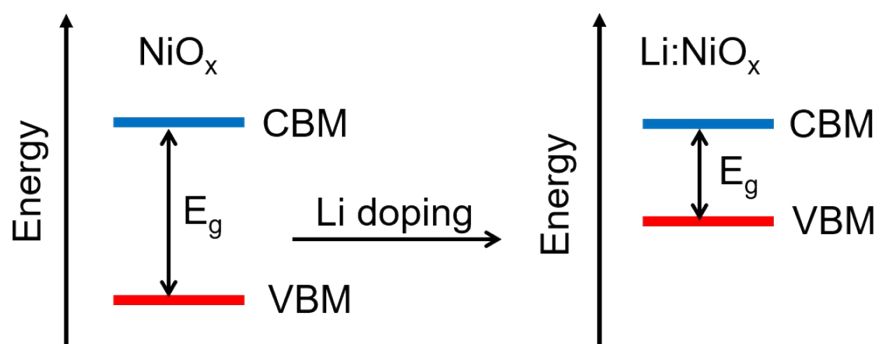

Fig. S1. Energy band structure of  $\text{Li:NiO}_x$  (CBM: bottom of conduction band; VBM: top of valence band).

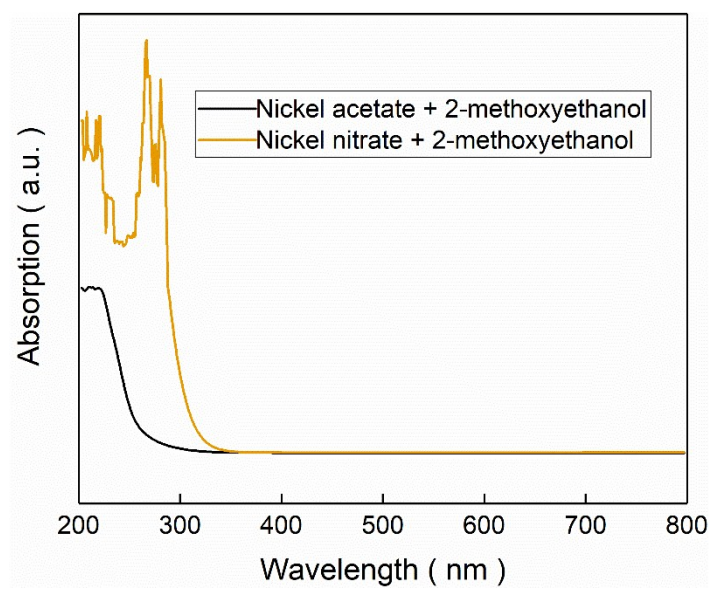

Fig. S2. Absorption spectra of the different precursors solutions.

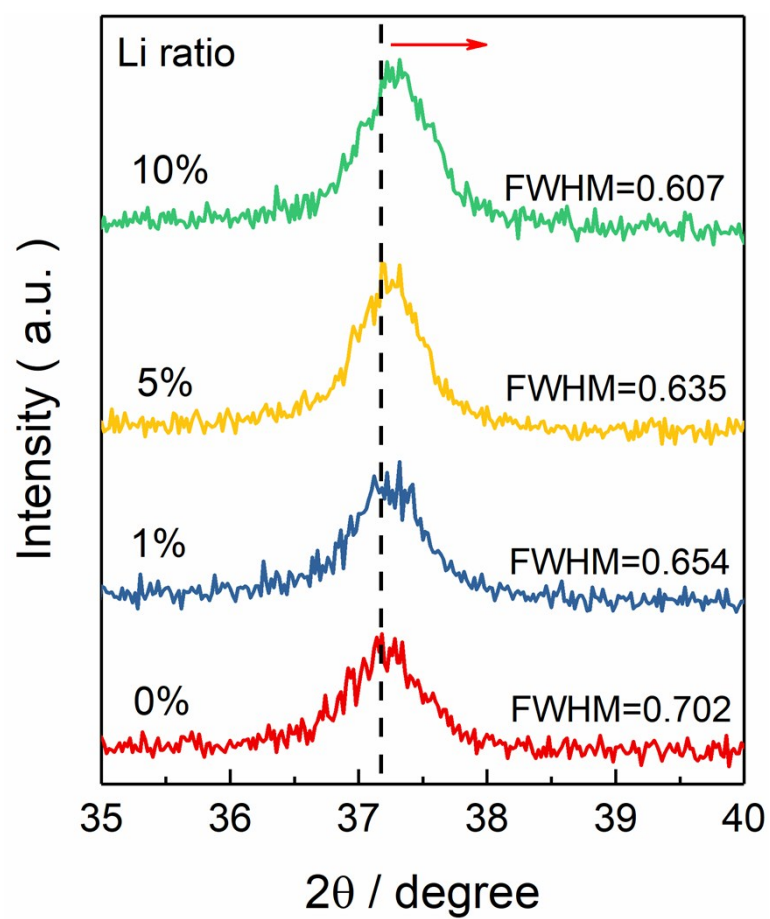

Fig. S3. The (110) plane of XRD patterns for Li:NiO<sub>x</sub> thin films.

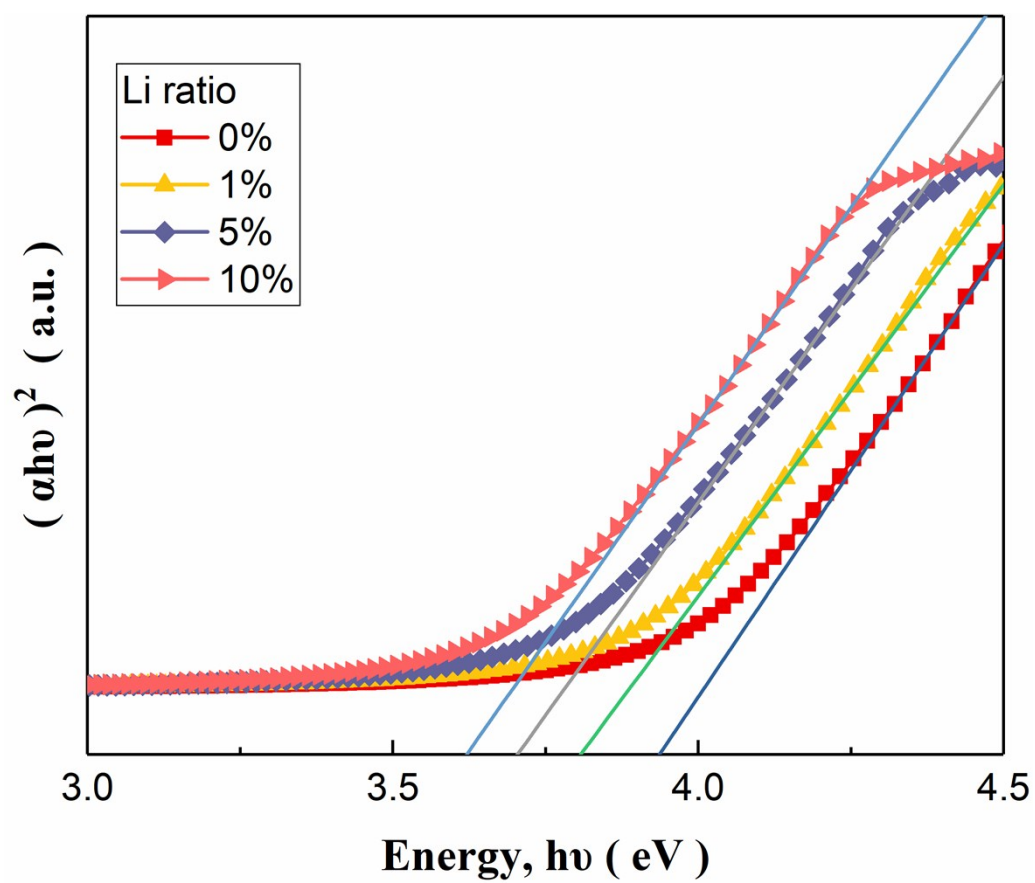

Fig. S4. Band gap extraction by Tauc model for Li:NiO<sub>x</sub> thin films.

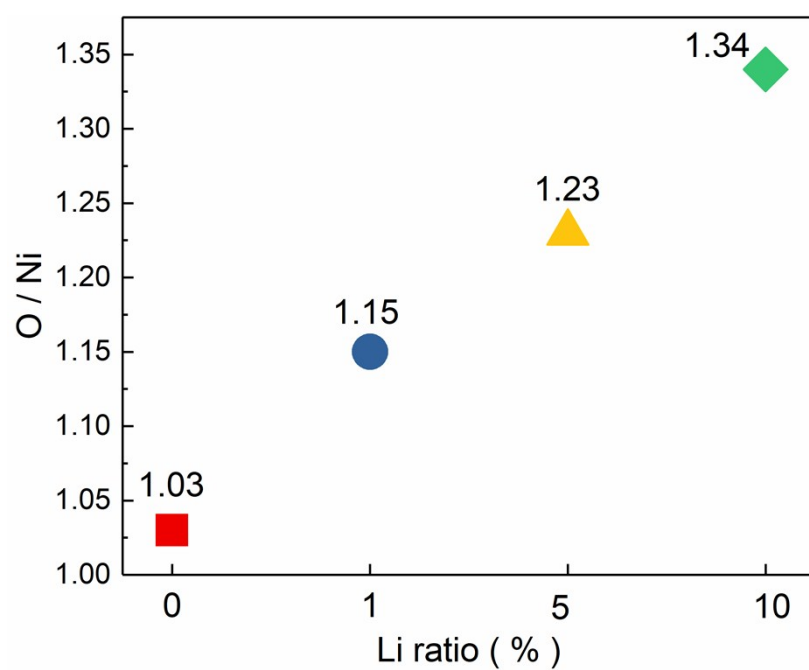

Fig. S5. O/Ni ratio measured by XPS with variation of Li concentration.

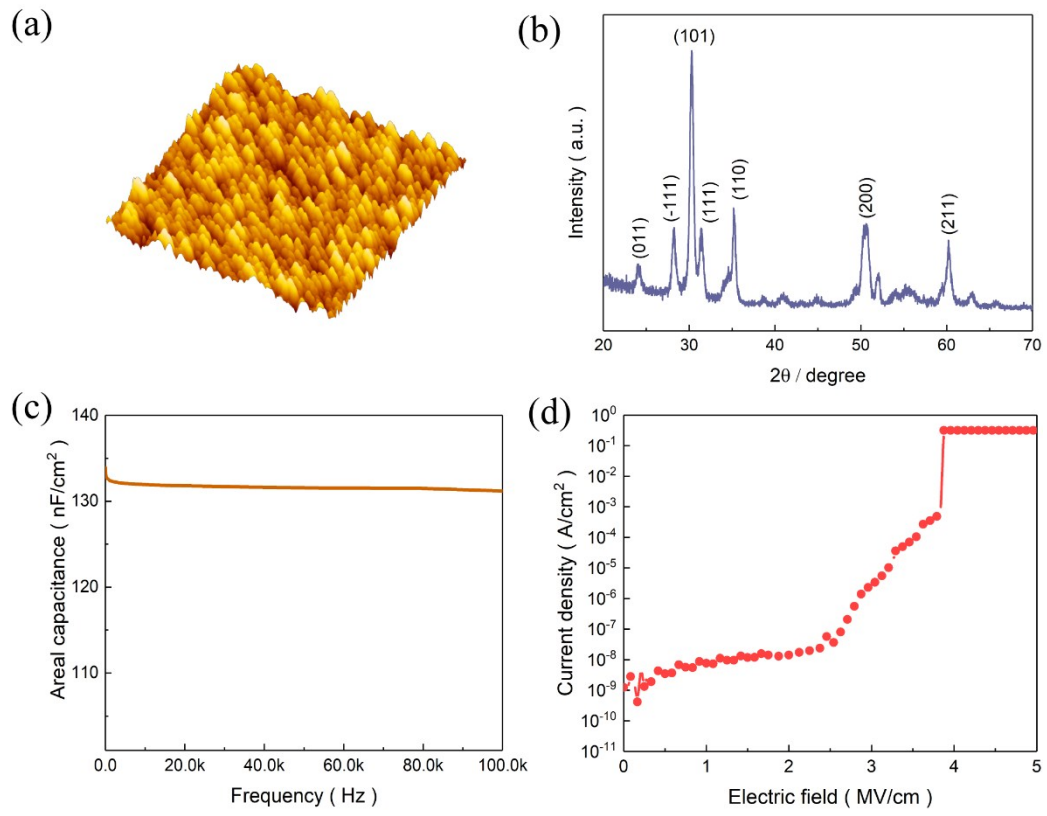

Fig. S6. (a) AFM images, (b) XRD pattern, (c) capacitance-frequency curves, and (d) leakage current characteristics of ALD-ZrO<sub>2</sub> dielectric.

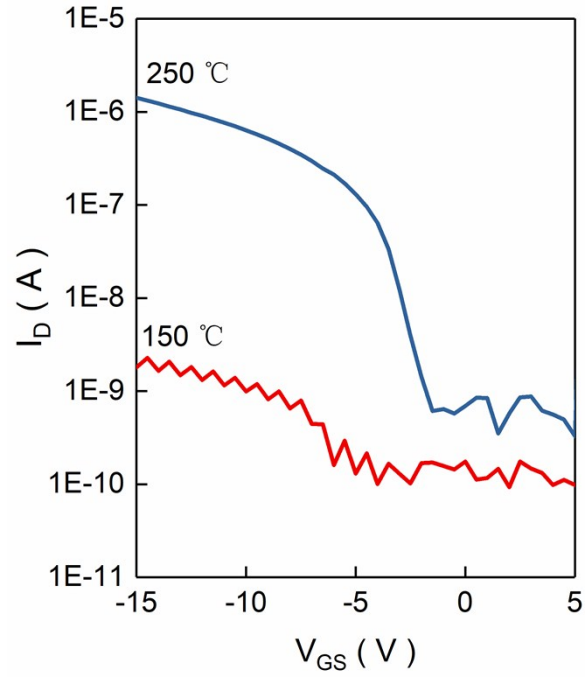

Fig. S7. Transfer curves of conventional-route  $\text{Li}_{5\%}\text{NiO}_x$  TFTs as a function of annealing at different temperature. The ALD- $\text{ZrO}_2$  grown on ITO glass as dielectric.
